# A Small Volatile Bacterial Molecule Triggers Mitochondrial Dysfunction in Murine Skeletal Muscle

A. Aria Tzika<sup>1,2,5\*</sup>, Caterina Constantinou<sup>1,5</sup>, Arunava Bandyopadhyaya<sup>1,5</sup>, Nikolaos Psychogios<sup>1,2,5</sup>, Sangseok Lee<sup>4,5</sup>, Michael Mindrinos<sup>3</sup>, J. A. Jeevendra Martyn<sup>4,5</sup>, Ronald G. Tompkins<sup>1</sup>, Laurence G. Rahme<sup>1,5\*</sup>

**1** Department of Surgery, Harvard Medical School and Massachusetts General Hospital, Boston, Massachusetts, United States of America, **2** Athinoula A. Martinos Center of Biomedical Imaging, Massachusetts General Hospital, Boston, Massachusetts, United States of America, **3** Department of Biochemistry, Stanford University School of Medicine, Stanford, California, United States of America, **4** Department of Anesthesiology and Critical Care, Harvard Medical School and Massachusetts General Hospital, Boston, Massachusetts, United States of America, **5** Shriners Hospitals for Children Boston, Boston, Massachusetts, United States of America

## Abstract

Mitochondria integrate distinct signals that reflect specific threats to the host, including infection, tissue damage, and metabolic dysfunction; and play a key role in insulin resistance. We have found that the *Pseudomonas aeruginosa* quorum sensing infochemical, 2-amino acetophenone (2-AA), produced during acute and chronic infection in human tissues, including in the lungs of cystic fibrosis (CF) patients, acts as an interkingdom immunomodulatory signal that facilitates pathogen persistence, and host tolerance to infection. Transcriptome results have led to the hypothesis that 2-AA causes further harm to the host by triggering mitochondrial dysfunction in skeletal muscle. As normal skeletal muscle function is essential to survival, and is compromised in many chronic illnesses, including infections and CF-associated muscle wasting, we here determine the global effects of 2-AA on skeletal muscle using high-resolution magic-angle-spinning (HRMAS), proton (<sup>1</sup>H) nuclear magnetic resonance (NMR) metabolomics, *in vivo* <sup>31</sup>P NMR, whole-genome expression analysis and functional studies. Our results show that 2-AA when injected into mice, induced a biological signature of insulin resistance as determined by <sup>1</sup>H NMR analysis-, and dramatically altered insulin signaling, glucose transport, and mitochondrial function. Genes including Glut4, IRS1, PPAR- $\gamma$ , PGC1 and Sirt1 were downregulated, whereas uncoupling protein UCP3 was up-regulated, in accordance with mitochondrial dysfunction. Although 2-AA did not alter high-energy phosphates or pH by *in vivo* <sup>31</sup>P NMR analysis, it significantly reduced the rate of ATP synthesis. This affect was corroborated by results demonstrating down-regulation of the expression of genes involved in energy production and muscle function, and was further validated by muscle function studies. Together, these results further demonstrate that 2-AA, acts as a mediator of interkingdom modulation, and likely effects insulin resistance associated with a molecular signature of mitochondrial dysfunction in skeletal muscle. Reduced energy production and mitochondrial dysfunction may further favor infection, and be an important step in the establishment of chronic and persistent infections.

**Citation:** Tzika AA, Constantinou C, Bandyopadhyaya A, Psychogios N, Lee S, et al. (2013) A Small Volatile Bacterial Molecule Triggers Mitochondrial Dysfunction in Murine Skeletal Muscle. PLoS ONE 8(9): e74528. doi:10.1371/journal.pone.0074528

**Editor:** Min Wu, University of North Dakota, United States of America

**Received:** January 31, 2013; **Accepted:** August 3, 2013; **Published:** September 30, 2013

**Copyright:** © 2013 Tzika et al. This is an open-access article distributed under the terms of the Creative Commons Attribution License, which permits unrestricted use, distribution, and reproduction in any medium, provided the original author and source are credited.

**Funding:** This work was supported in part by a Shriner's Hospital for Children research grant no. 87100 to Laurence G. Rahme, and by a Center grant of the National Institutes of Health to the Stanford Genome Technology Center. The funders had no role in study design, data collection and analysis, decision to publish, or preparation of the manuscript.

**Competing Interests:** The authors have declared that no competing interests exist.

\* E-mail: atzika@hms.harvard.edu (AAT); rahme@molbio.mgh.harvard.edu (LGR)

## Introduction

Pathogens modulate host cell functions to promote their own survival within the host dynamic environment, and to evade the host immune system by hijacking functions of cell organelles, including plasma rafts [1], golgi [2], and mitochondria [3]. Mitochondria act as signaling platforms in diverse biological processes, including apoptosis [3], metabolism, and innate immune signaling [4]. Bacterial small molecules can alter mitochondrial function [5], [6], with bacterial effector proteins and toxins primarily affecting mitochondrial programmed apoptosis [3]; and bacterial membrane constituents, such as lipopolysaccharide (LPS) and peptidoglycan (PGN) triggering metabolic diseases, including insulin resistance [7].

Environmental stimuli can alter mitochondrial function via coordinated changes in gene expression [8]. For instance, specific

members of the peroxisomal proliferator activator receptor (PPAR)- $\gamma$  and proliferator activator receptor (PPAR)- $\gamma$  coactivator (PGC1) gene families respond to physiological stimuli to regulate genes that control mitochondrial biogenesis [9], nuclear and mitochondrial oxidative metabolism, tricarboxylic acid (TCA) cycle enzymes, whole body glucose homeostasis, and lipid oxidation and electron transport complexes [10]. Also, cellular stress and infection are sensed by the innate immune system by pattern recognition receptors, which upon activation, initiate defense and repair pathways [11], [12]. It is possible that, similarly to viruses, bacteria may activate the inflammasome via altered cell metabolism and mitochondrial activity [13–16].

Metabolic responses begin promptly upon the initiation of infection, and progress as a series of coordinated events [17]. Mitochondria may play a key role in the development of insulin

resistance [18]. For example, glucose stimulated insulin secretion from pancreatic  $\beta$  cells requires intact mitochondrial function [19]: modifications in mitochondrial oxidative activity and mitochondrial adenosine triphosphate synthesis is linked to insulin resistance [19], and these changes involve the up-regulation of mitochondrial uncoupling proteins (UCPs) [20]; altered mitochondrial fatty acid oxidation, together with the accumulation of intracellular fatty acid metabolites (acyl-CoA and diacylglycerol), disrupts insulin signaling, a phenomenon exacerbated by free fatty acids (FFA) [21]; and genes involved in mitochondria biogenesis such as the PPAR- $\gamma$  and PGC-1 ( $\alpha$  and  $\beta$  are down-regulated in patients with insulin resistance [22], [23] and possibly also down-regulated in insulin resistant cystic fibrosis (CF) patients [24], [25].

CF patients are particularly susceptible to highly problematic *Pseudomonas aeruginosa* infections. This pathogen, which causes chronic infections that are often intractable to traditional antibiotic therapy [26],[27], employs cell-to-cell communication systems, termed quorum sensing (QS). QS regulates collective behaviors, including virulence, that depend on the actions of specific excreted diffusible small molecular signals, termed infochemicals [28], [29]. QS infochemicals also act as immunomodulatory signals [30], [31], and respiratory chain inhibitors [6]. The infochemical 2-amino-acetophenon (2-AA) [32], [33] signals phenotypic changes in the pathogen [34], and modulates host immune responses [31] that favor chronic infections, and potentially compromise host metabolism.

Here we employ metabolomics, genomics, and functional analyses to interrogate the *in vivo* 2-AA effects on mitochondrial function. We use Nuclear Magnetic Resonance (NMR) spectroscopy, which can demonstrate mitochondrial dysfunction [35],[36] to assess physiological and metabolic biomarkers in intact muscle; and *in vivo* NMR, to assess functional mitochondrial metabolism. This technique is superior to biopsy-based genomic analysis, which can only interrogate mitochondrial capacity versus function [37]. Our results show that 2-AA, beyond its previously identified immunomodulatory activity [31], triggers host metabolic changes that occur concurrently with mitochondrial and skeletal muscle dysfunction, to promote pathogenicity.

## Materials and Methods

### Experimental animals

6-wk-old male CD1 mice weighing approximately 20–25 g were purchased from Charles River Laboratory (Boston, MA). The animals were maintained on a regular light-dark cycle (lights on from 8:00 h to 20:00 h) at an ambient temperature of  $22 \pm 1^\circ\text{C}$ , with free access to food and water. Mice were injected intraperitoneally (IP) with 100  $\mu\text{l}$  of 2-AA (6.75 mg /kg mice), and mouse skeletal muscle was analyzed 4 days post 2-AA treatment. *In vivo*  $^{31}\text{P}$  NMR spectroscopy was performed on intact mice, and *ex vivo*  $^1\text{H}$  NMR spectroscopy was performed on intact gastrocnemius muscle samples.

### Ethics Statement

This study was carried out in strict accordance with the recommendations of the Guide for the Care and Use of Laboratory Animals of the National Institutes of Health. The protocol was approved by the Committee on the Ethics of Animal Experiments at Massachusetts General Hospital (Permit Number: 2006N000093/2). All procedures were performed under sodium pentobarbital anesthesia, and every effort was made to minimize suffering.

### $^{31}\text{P}$ NMR spectroscopy

**Data acquisition.** The theoretical basis of saturation transfer experiments and calculations were as described by Forsen and Hoffman [36], [38]. Animals were analyzed using *in vivo*  $^{31}\text{P}$  NMR spectroscopy 4 days post 2-AA treatment. Mice were transiently anesthetized with isoflurane (3.0%) plus  $\text{O}_2$  (2.0 l/min) delivered through a nose cone, and then placed in a customized restraining tube. Each animal's right hind limb was placed into a solenoid coil (four turns; length, 2 cm; diameter, 1 cm) tuned to  $^{31}\text{P}$  frequency (162.1 MHz). During MR imaging, mice were continuously anesthetized with isoflurane (1.5%) plus  $\text{O}_2$  (1.0 l/min). The rectal body temperature was maintained at  $37 \pm 1^\circ\text{C}$  using heated water blankets. All *in vivo*  $^{31}\text{P}$  NMR experiments were performed in a horizontal bore magnet (proton frequency at 400 MHz, 21 cm diameter, Magnex Scientific, Varian, Palo Alto, CA, USA) using a Bruker Advance console. Field homogeneity was adjusted using the  $^1\text{H}$  signal of tissue water. A  $90^\circ$  pulse was optimized for detection of phosphorus spectra (repetition time 2 s, 400 averages, 4,096 data points). Saturation  $90^\circ$  selective pulse trains (duration, 36.533 ms; bandwidth, 75 Hz) followed by crushing gradients were used to saturate the  $\gamma$ -ATP peak. The same saturation pulse train was also applied downfield of the inorganic phosphate (Pi) resonance, symmetrically to the  $\gamma$ -ATP resonance. T1 relaxation times of Pi and phosphocreatine (PCr) were measured using an inversion recovery pulse sequence in the presence of  $\gamma$ -ATP saturation. An adiabatic pulse (400 scans; sweep width, 10 kHz; 4,000 data points) was used to invert Pi and PCr, with an inversion time between 152 and 7,651 ms.

**Data analysis.**  $^{31}\text{P}$  NMR spectra were analyzed using the MestReNova NMR software package (Mestrelab Research S.L., v. 6.2.1 NMR solutions, Website: www.mestrec.com). Free induction decays were zero-filled to 8,192 points and apodized with exponential multiplication (30 Hz) before Fourier transformation. The spectra were then manually phased and corrected for baseline broad features using the Whittaker smoother algorithm [39]. The Levenberg–Marquardt algorithm was used to least-square-fit a model of mixed Gaussian/Lorentzian functions to the data. Similarly, the  $T_{1\text{obs}}$  relaxation time for Pi and PCr was calculated by fitting the function  $y = A1(1 - A2e^{-(t/T_{1\text{obs}})})$  to the inversion recovery data, where  $y$  is the  $z$  magnetization, and  $t$  is the inversion time.

**Calculation of intramyocellular pH.** The formula  $\text{pH} = 6.75 + \log[(s - 3.27)/(5.69 - s)]$ , where  $s$  is the chemical shift difference (in ppm) between the Pi and the PCr peaks [40] was used to calculate intramyocellular pH.

**Calculation of ATP concentration.** ATP concentration was measured using the Bioluminescence Assay Kit CLS II, Cat# 1699695 (Roche Diagnostics Corporation, Indianapolis, IN 46250-0414, USA).

**Calculation of ATP synthesis rate.**  $^{31}\text{P}$ -NMR spectra data, and the ATP concentration, were used to calculate the ATP synthesis rate, as described by Forsen and Hoffman [38]. In brief, the chemical reaction between Pi and ATP is:

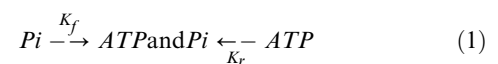

Where  $k_f$  and  $k_r$  are reaction rate constants in each direction. The influence of the chemical exchange between Pi and ATP on the longitudinal magnetization  $M_{(P)}$  of Pi is described by:

$$\frac{dM(Pi)}{dt} = \frac{M_{0(Pi)} - M_{(Pi)}}{T_{1(Pi)}} - k_f M_{(Pi)} + k_r M_{(ATP)} \quad (2)$$

At equilibrium ( $\frac{dM_{(Pi)}}{dt} = 0$ ) so at saturated ATP, ( $M_{(ATP)} = 0$ ) the equation (2) becomes

$$\frac{M_{(Pi)}}{M_{0(Pi)}} = \frac{1}{1 + k_f T_{1(Pi)}} \quad (3)$$

The spin lattice relaxation time  $T_{1app}$ , measured using the inversion recovery pulse sequence in the presence of the ATP saturation, is related to the intrinsic  $T_{1(Pi)}$  by:

$$\frac{1}{T_{1app}} = \frac{1}{T_{1(Pi)}} + k_f \quad (4)$$

Combining (3) and (4) gives:

$$k_f = \frac{1}{T_{1app}} \times \frac{\Delta M_{(Pi)}}{M_{0(Pi)}} \quad (5)$$

where  $\frac{\Delta M_{(Pi)}}{M_{0(Pi)}}$  is the fractional change of the longitudinal magnetization  $M_{(Pi)}$  of Pi. All the quantities on the right side of (5) can be calculated from the NMR data. Finally the unidirectional ATP synthesis flux can be calculated as

$$\left(\frac{dATP}{dt}\right)_{synth} = k_f [Pi] \quad (6)$$

where Pi is the concentration of Pi extrapolated from the baseline NMR spectrum by comparing the peak integrals from Pi and  $\gamma$ -ATP, with respect to ATP concentration.

### Extraction of RNA Samples

The left gastrocnemius muscle was harvested at 4 days post 2-AA treatment ( $n = 3$ , for each time point), to determine changes in whole muscle gene expression. Mice were anesthetized by IP injection of 40 mg/kg pentobarbital, and the muscle specimens were excised and immediately immersed in 1 ml Trizol (GibcoBRL, Invitrogen, Carlsbad, CA) for RNA extraction. All mice were then administered a lethal dose of pentobarbital (200 mg/kg) by IP injection. Each muscle specimen was homogenized for 60 s with a Brinkman Polytron 3000 before total RNA extraction. Chloroform (200  $\mu$ l) was added to the homogenized muscle and mixed by inverting the tube for 15 s. After centrifugation at 12000  $\times g$  for 15 min, the upper aqueous phase was collected and precipitated by adding 500  $\mu$ l isopropanol. Further centrifugation at 12000  $\times g$  for 10 min separated the RNA pellet, which was then washed with 500  $\mu$ l of 70% ethanol and centrifuged at 7500  $\times g$  for 5 min prior to air drying. The pellet was resuspended in 100  $\mu$ l DEPC-H<sub>2</sub>O. An RNeasy Kit (Qiagen, Maryland, USA) was used to purify the RNA according to the manufacturer's protocol. Purified RNA was quantified by UV absorbance at 260 nm and 280 nm, and stored at  $-70^\circ\text{C}$  for DNA microarray analysis.

### High-Resolution Magic Angle Spinning (HRMAS) $^1\text{H}$ NMR spectroscopy of intact skeletal muscle tissue

At 4 days post 2-AA treatment, three experimental and three untreated control animals were analyzed with HRMAS  $^1\text{H}$  NMR. The skeletal muscle tissue underlying the hind limb burn site was harvested, immediately frozen in liquid nitrogen, and stored at  $-80^\circ\text{C}$ . HRMAS  $^1\text{H}$  NMR spectroscopy of muscle tissue was performed on a Bruker Bio-Spin Avance NMR spectrometer (proton frequency at 600.13 MHz, 89 mm Vertical Bore) using a 4-mm triple resonance ( $^1\text{H}$ ,  $^{13}\text{C}$ ,  $^2\text{H}$ ) HRMAS probe (Bruker, Billerica, Massachusetts). The temperature was maintained at  $4^\circ\text{C}$  with a BTO-2000 thermocouple unit in combination with a magic angle spinning (MAS) pneumatic unit (Bruker). The MAS speed was stabilized at  $4.0 \pm 0.001$  kHz with a MAS speed controller.  $^1\text{H}$  NMR spectra were acquired using a Carr-Purcell-Meiboom-Gill (CPMG) spin echo pulse sequence, ( $90^\circ - (\tau - 180^\circ - \tau)_n$ -acquisition), with an inter-pulse delay ( $\tau$ ) of 250  $\mu$ s. Hard  $90^\circ$  (8  $\mu$ s) and  $180^\circ$  (16  $\mu$ s) pulse trains were employed. The relaxation delay was set to 2 s, and spectra were collected both with and without water suppression. The transverse relaxation time ( $T_2$ ) was measured using the same CPMG pulse sequence by varying  $n$  from 0 to 520. Free induction decay (FID) signals were acquired with 8 k points, 600 ms acquisition time, 8 dummy scans, and 128 scans.

HRMAS  $^1\text{H}$  NMR spectra were analyzed using the MestRe-C NMR software package (Mestrelab Research, Santiago de Compostela, Spain, www.mestrec.com). FIDs were zero-filled to 16 k points, and apodized with exponential multiplication (1 Hz) before Fourier transformation. The spectra were then manually phased and corrected for baseline broadening (Whittaker smoother, smooth factor 10,000). The Levenberg-Marquardt algorithm was used to least-squares-fit a model of mixed Gaussian/Lorentzian functions to the data.

The  $(\text{CH}_2)_{n-2}$  peak at 1.32 ppm was selected for quantification of intramyocellular lipids (IMCL). Because the sample was spun at magic angle, and the sample volume was much smaller (25  $\mu$ l) and more homogeneous (reduced bulk magnetic susceptibility effects) than the typical voxel size (1 ml) of *in vivo*  $^1\text{H}$  MRS, no chemical shift difference was observed between IMCL and extramyocellular lipids (EMCL). The small size of the muscle biopsies, and the fact that the samples were collected from the most myocellular part of the muscle, suggest that the main contribution to the  $(\text{CH}_2)_{n-2}$  peak was from IMCL lipids.

### Absolute quantification of metabolites from 1-D CPMG spectra

Resonance intensities were measured for  $-\text{CH}_3$  protons of trimethylsilyl-propionic-2,2,3,3-d<sub>4</sub> acid (TSP), and compared to the resonance intensities measured for metabolite. The peak intensities of most of the metabolites, as well as of TSP, were calculated from the intensity of the respective resonance (X) measured from the T<sub>2</sub>-filtered HRMAS  $^1\text{H}$  MR spectrum. The calculated peak intensities were then corrected for T<sub>2</sub> relaxation, using  $I_c(X) = I_r(X) * \exp(T_{CPMG}/T_2(X))/n$ , where  $I_r(X)$  is the measured intensity,  $T_{CPMG}$  is the CPMG echo time, and  $n$  is the number of protons in the functional group, and corresponds to the resonance of the metabolite. In accordance with the "external standard" technique [41], metabolite concentrations were quantified relative to the absolute concentration ( $\mu\text{mol}$ ) of the respective metabolite ( $M$ ) =  $I_c(M)/(I_{cTSP}(M) * wt)$ , where  $wt$  is the weight of the sample in grams.

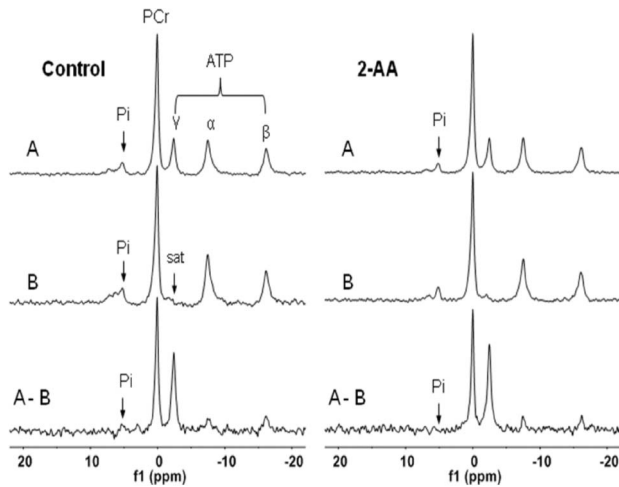

**Figure 1. NMR spectra of *in vivo*  $^{31}\text{P}$  NMR saturation-transfer on mouse hind limb skeletal muscle.** Representative summed  $^{31}\text{P}$ -NMR spectra acquired from control and 2-AA treated mice at day 4, before (A) and after (B) saturation of the  $\gamma$ -ATP resonance, with the difference spectrum between the two shown below (A-B). The arrow on  $\gamma$ -ATP indicates the position of saturation (sat) by rf irradiation ( $-2.4$  ppm, chemical shift in parts per million). doi:10.1371/journal.pone.0074528.g001

### Statistical analysis of HRMAS $^1\text{H}$ NMR spectroscopy data

Data are reported as means  $\pm$  standard errors of the mean. Between-groups comparison was performed using analysis of variance with Bonferroni correction for multiple comparisons. Criterion for significance was  $p < 0.0125$  corrected. Comparison between measurements was performed in each group with t-test (two-tailed,  $p < 0.0125$ ). All analysis was performed using SPSS (SPSS v12, SPSS Inc.).

### Microarray hybridization

Biotinylated cRNA was generated with 10  $\mu\text{g}$  of total cellular RNA according to the protocol outlined by Affymetrix Inc. (Santa Clara, CA, USA). The cRNA was hybridized onto MOE430A oligonucleotide arrays (Affymetrix, CA, USA), stained, washed, and scanned according to the Affymetrix protocol.

### Genomic data analysis

Data files of the scanned image files hybridized with probes from RNA extracted from the gastrocnemius muscle isolated at the specified times from experimental and control mice ( $n = 3$ ) were converted to cell intensity files (.CEL files) with the Microarray suite 5.0 (MAS, Affymetrix, CA, USA). The data were scaled to a target intensity of 500, and all possible pairwise array comparisons of the replicates to normal control mice were performed for each time point (i.e., four combinations when two arrays from each time point were compared to the two arrays hybridized to RNA from control mice) using a MAS 5.0 change call algorithm. Probe sets that had a signal value difference greater than 100 and for which one of the two samples being compared was not called "absent", were scored as differentially modulated when 1) the number of change calls in the same direction were at least 3, 4, and 6, when the number of comparisons were 4, 6, and 9, respectively; and 2) the other comparisons were unchanged. Based on the ratios of 100 genes determined to be invariant in most conditions tested (Affymetrix, CA), an additional constraint of a minimum ratio of 1.65 was applied to control for the known false positives at 5%. The Microarray data is available in <http://www.ncbi.nlm.nih.gov/geo/info/linking.html> and the accession number is GSE43779. GO analysis has been performed using the GeneSpring GX software (version 11) by Agilent Technologies.

**Table 1. *In vivo*  $^{31}\text{P}$ -NMR saturation transfer analysis of limb skeletal muscle from control and 2-AA treated mice.**

|                                                                                            | Control (n=6)     | 2-AA (n=6)        | $\Delta$ (%) | p-value |
|--------------------------------------------------------------------------------------------|-------------------|-------------------|--------------|---------|
| <b>ATP synthesis flux (reaction <math>\text{P}_i \rightarrow \gamma\text{-ATP}</math>)</b> |                   |                   |              |         |
| $\Delta M/M_0$                                                                             | $0.33 \pm 0.04$   | $0.23 \pm 0.02$   | -30.6        | 0.015   |
| $T_{1\text{obs}}$ (s)                                                                      | $1.13 \pm 0.24$   | $1.26 \pm 0.19$   | 11.5         | NS      |
| $K_f$ ( $\text{s}^{-1}$ )                                                                  | $0.29 \pm 0.07$   | $0.18 \pm 0.03$   | -37.9        | 0.005   |
| ATP ( $\mu\text{mol/g}$ )                                                                  | $1.19 \pm 0.28$   | $0.22 \pm 0.05$   | -81.3        | <0.001  |
| $\text{P}_i$ ( $\mu\text{mol/g}$ )                                                         | $0.39 \pm 0.13$   | $0.06 \pm 0.02$   | -84.2        | 0.011   |
| ATP synthesis rate ( $\mu\text{mol/g/s}$ )                                                 | $0.113 \pm 0.047$ | $0.011 \pm 0.004$ | -90.3        | 0.008   |
| <b>ATP synthesis flux (reaction <math>\text{PCr} \rightarrow \gamma\text{-ATP}</math>)</b> |                   |                   |              |         |
| $\Delta M/M_0$                                                                             | $0.34 \pm 0.01$   | $0.31 \pm 0.02$   | -8.1         | (NS)    |
| $T_{1\text{obs}}$ (s)                                                                      | $1.59 \pm 0.20$   | $1.65 \pm 0.21$   | 3.8          | (NS)    |
| $K_f$ ( $\text{s}^{-1}$ )                                                                  | $0.21 \pm 0.03$   | $0.19 \pm 0.03$   | -11.4        | (NS)    |
| ATP ( $\mu\text{mol/g}$ )                                                                  | $1.19 \pm 0.28$   | $0.22 \pm 0.05$   | -81.3        | <0.001  |
| PCr ( $\mu\text{mol/g}$ )                                                                  | $4.19 \pm 1.14$   | $0.85 \pm 0.24$   | -79.7        | <0.001  |
| ATP synthesis rate ( $\mu\text{mol/g/s}$ )                                                 | $0.884 \pm 0.267$ | $0.159 \pm 0.049$ | -82.0        | <0.001  |

Values are means  $\pm$  SEM;  $\Delta M/M_0$  is the fractional change in  $\text{P}_i$  or PCr magnetization as a result of saturation transfer;  $T_{1\text{obs}}$  is the observed spin lattice relaxation time of  $\text{P}_i$  or PCr during  $\gamma$ -ATP saturation in seconds;  $K_f$  is the rate constant for the reactions  $\text{P}_i \rightarrow \gamma\text{-ATP}$  and  $\text{PCr} \rightarrow \gamma\text{-ATP}$ , calculated as  $(1/T_{1\text{obs}}) \times (\Delta M/M_0)$ . ATP synthesis is calculated as  $\text{P}_i$  or  $\text{PCr} \times K_f$ . NS: not significant. Unpaired one-tailed Student's t-test was used for the comparisons. doi:10.1371/journal.pone.0074528.t001

gov/geo/info/linking.html and the accession number is GSE43779. GO analysis has been performed using the GeneSpring GX software (version 11) by Agilent Technologies.

### Cell culture

The C2C12 murine skeletal muscle cell line (American type culture collection, Bethesda, MD) was maintained in Dulbecco's modified Eagle's medium (DMEM, Gibco) supplemented with 10% fetal bovine serum (Gibco) containing penicillin/streptomycin and gentamycin (Gibco) in the presence of 5%  $\text{CO}_2$  at  $37^\circ\text{C}$ . The cells were seeded in T-75 tissue culture flasks (Falcon, USA) and used between passages 2 and 3.

### 2-AA cell treatment

C2C12 cells were plated at a density of  $10^5/\text{ml}$  in 6-well plates and grown overnight at  $37^\circ\text{C}$  in 5%  $\text{CO}_2$ . Cells in the treatment groups were treated with 0.8 mM 2-AA for 24, 36 and 48 h, and then 2-AA treated or non-treated cells were washed with PBS.

### Western blot analysis

Cellular extracts were prepared in RIPA buffer (Cell Signaling Technology). Twenty five micrograms of total protein were added to Laemmli buffer, boiled for 5 min, resolved by 7.5% or 10% polyacrylamide gel electrophoresis (PAGE) in Tris/glycine/SDS buffer (25 mM Tris, 250 mM glycine, 0.1% SDS), and transferred to PVDF membranes (Bio-Rad, Hercules, CA). The membranes were blocked for 2 h in TBS-T (20 mM Tris-HCL, 150 mM NaCl, 0.1% Tween20) containing 5% non-fat milk. The membranes were then washed three times in TBS-T and probed overnight with rabbit antibodies specific for goat PPAR- $\gamma$ , rabbit SIRT-1, mouse monoclonal PGC-1 $\beta$  (Santa Cruz Biotechnology, Inc., Santa Cruz, CA) at a dilution of 1:1,000, and mouse  $\alpha$ -tubulin (Santa Cruz Biotechnology, Inc) at a dilution of 1:2,000.

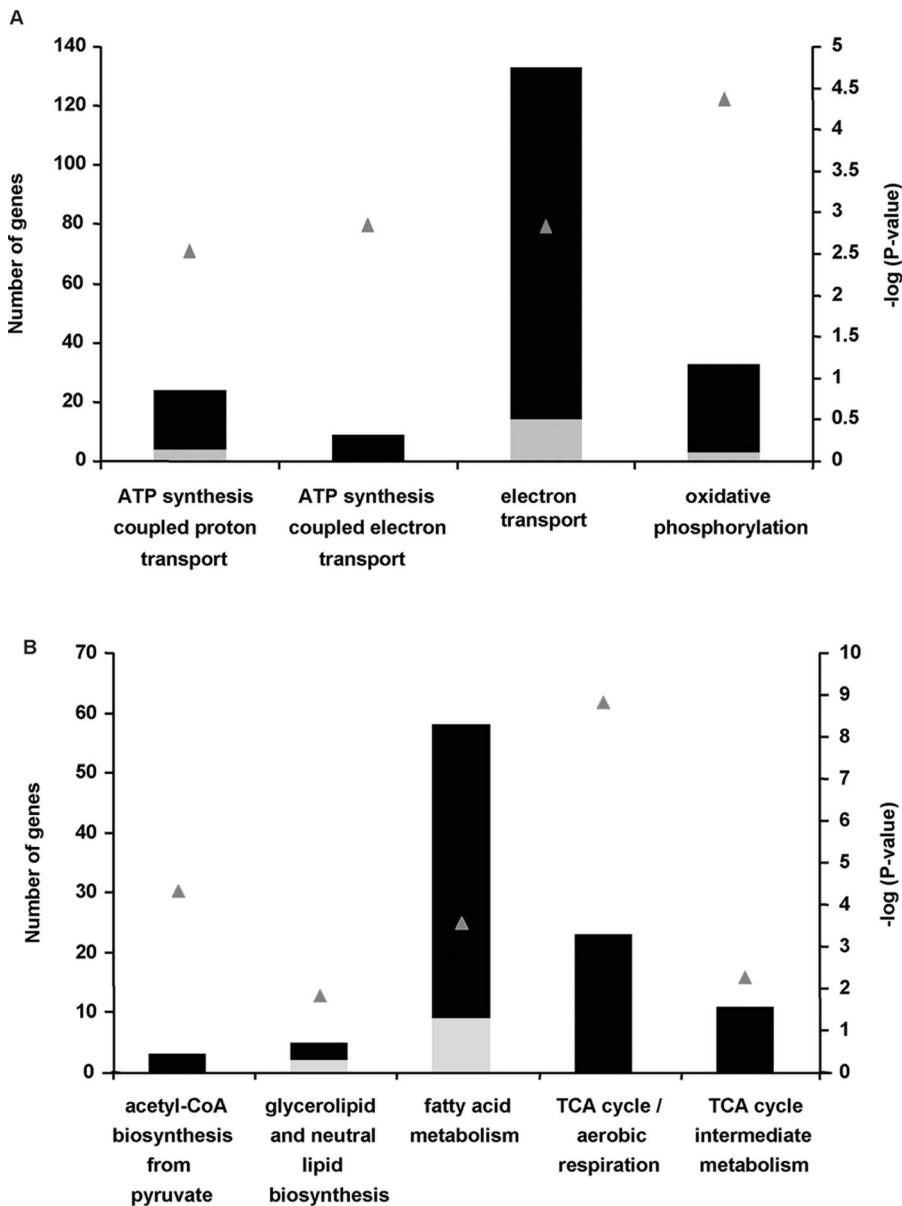

**Figure 2. 2-AA treatment differentially modulates the genes involved in energy production and intermediate metabolism in skeletal muscle.** Differentially expressed genes involved in energy production (A) and intermediate metabolism (B) in response to 2-AA treatment. Grey boxes represent up-regulation, and black boxes represent down-regulation, of the respective gene in muscle from 2-AA treated versus control mice. The negative log<sub>10</sub> of p-values represented by gray triangles are shown in the right vertical axis. The expression of certain key genes is down-regulated, consistent with the *in vivo* <sup>31</sup>P-NMR data (Figure 1 and Table 2). doi:10.1371/journal.pone.0074528.g002

Following three washes in TBS-T, the membranes were incubated with secondary horse-radish peroxidase (HRP)-conjugated rabbit anti goat IgG, goat anti-rabbit IgG (Santa Cruz Biotechnology,

Inc) or goat anti-mouse IgG secondary antibodies (Promega, Madison, WI), respectively for 1 h, and then washed three times in TBS-T. The blots were visualized with SuperSignal West Pico

**Table 2.** <sup>1</sup>H NMR HRMAS analysis on gastrocnemius muscle from 2-AA treated and control mice.

| Chemical Shift PPM | Chemical group                  | Control                  | 4 days Post 2-AA | Percent Change | p-value            |
|--------------------|---------------------------------|--------------------------|------------------|----------------|--------------------|
| 1.30               | (CH <sub>2</sub> ) <sub>n</sub> | 0.14 ± 0.01 <sup>a</sup> | 0.08 ± 0.02      | +118.9         | 0.029 <sup>b</sup> |

**Footnote:** <sup>a</sup> values (μmol/g muscle) are means ± standard errors from 8 samples per group; <sup>b</sup> p value for comparisons between 2-AA treated and control mice obtained with the Student's t-test; + indicates increase  
doi:10.1371/journal.pone.0074528.t002

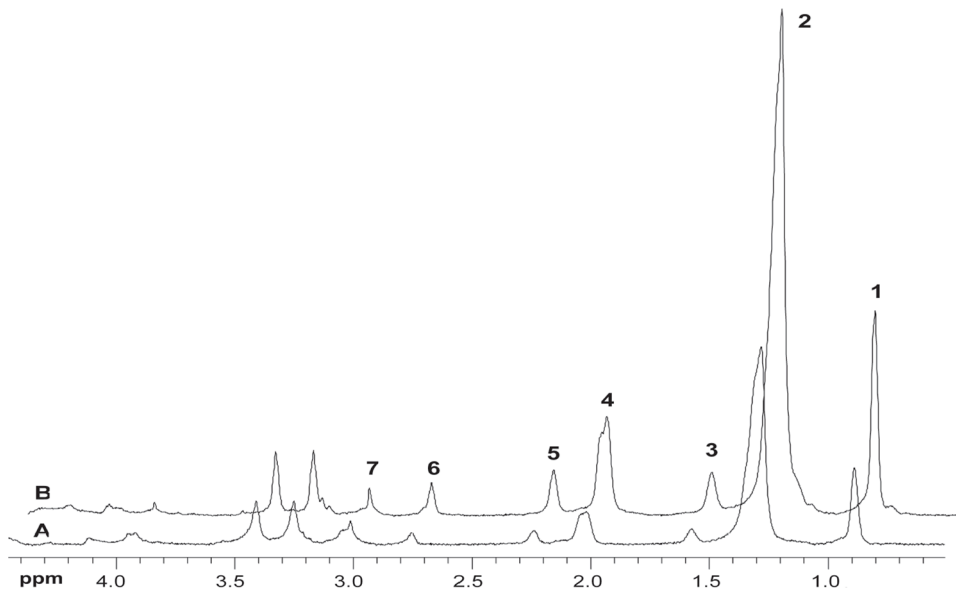

**Figure 3. NMR spectra from  $^1\text{H-NMR HRMAS}$  analysis of gastrocnemius skeletal muscle from 2-AA treated versus control mice.** The spectra were acquired from 2-AA treated mice at 4 d versus control mice, and scaled to the phosphocreatine plus creatine peak (3.02 ppm). Resonance signals of lipids correspond to: 1) terminal methyl  $\text{CH}_3$  protons (0.9 ppm); 2) acyl chain methylene protons  $(\text{CH}_2)_n$  of intramyocellular lipids (IMCLs) (1.3 ppm); 3) methylene protons  $\text{CH}_2\text{-CO}$  (1.6 ppm); 4) allylic methylene protons  $\text{C}=\text{C-CH}_2\text{-C}$  of monounsaturated fatty acyl moieties (MUFAs) (2.05 ppm); 5)  $\alpha$  methylene protons  $\text{CH}_2\text{CO}$  (2.25 ppm); 6) diallylic methylene protons  $=\text{C-CH}_2\text{-C}=\text{C}$  of polyunsaturated fatty acyl moieties (PUFAs); and 7) N-methyl protons of phosphocreatine and creatine (3.0 ppm), respectively. The NMR spectra demonstrate increased biomarkers of insulin resistance IMCLs.

doi:10.1371/journal.pone.0074528.g003

Chemiluminescent Substrate (Thermo Scientific, Rockford, IL), according to the manufacturer's instructions.

#### MTT assay for cell cytotoxicity

The cytotoxicity of cells treated with 0.8 mM 2-AA was measured by MTT assay as previously described [31].

#### Plasma FFA assay

Blood was drawn by heart puncture at the time of sacrifice, and the plasma FFA level was measured via the calorimetric FFA assay kit that uses acylation of coenzyme A (NEFA C; Wako Chemicals USA, Inc., Richmond, VA).

#### Neuromuscular Function Studies

Functional neuromuscular studies were performed to determine the tensions developed after perturbation with the bacterial molecule and test the integrity of neurotransmission at 4 days post 2-AA treatment. Mice were anesthetized with pentobarbital (60–70 mg/kg, IP), with adequate depth of anesthesia confirmed by the absence of the withdrawal response to toe clamping. Anesthesia was maintained with supplemental intermittent doses of pentobarbital (10–20 mg/kg, IP), every 15–20 minutes. The body temperature was monitored using a rectal thermistor and maintained at 35.5–37°C with a heat lamp. Neuromuscular transmission was monitored by evoked mechanomyography using a peripheral nerve stimulator (NS252, Fisher & Paykel Health Care, Irvine, CA) along with a Grass Force transducer and corresponding software (Grass Instruments, Quincy, MA). With the mice in dorsal recumbency, the tendon of insertion of the tibialis muscle was surgically exposed on each side, and individually attached to separate grass FT03 force displacement transducers. The sciatic nerve was exposed at its exit from the lumbosacral plexus at the thigh and tied with ligatures for indirect

nerve stimulation of the muscles. Distal to the ligatures, stimulation electrodes were attached for nerve-mediated stimulation of the tibialis muscle. The knee was rigidly stabilized with a clamp to prevent limb movement during nerve stimulation. Baseline tensions of 10 grams, which yielded optimal evoked tensions, were applied on the immobilized and sham-immobilized tibialis muscles. The sciatic-nerve-evoked tensions of the respective tibialis muscles that were calibrated in grams of force were recorded via a Grass P122 amplifier and displayed using the Grass Polyview Software (Grass Instruments, Quincy, MA). Supramaximal electrical stimuli of 0.2 msec duration were applied to the sciatic nerve at 2 Hz for 2 sec (train-of-four pattern, TOF), every 20 sec, using a Grass S88 stimulator and SIU5 stimulus isolation unit (Grass Instruments, Quincy, MA). The evoked muscle tension developed during TOF stimulation was recorded at the end of 15-min. This was followed by tetanic stimulation at 50 Hz for 5 s to assess the maximal tetanic muscle tension, and the muscle fade associated with stimulus. All values are expressed as mean  $\pm$  S.E.M. (standard errors of mean). Differences between the two sides of the 2-AA group and control mice were compared using two-way ANOVA test and Bonferroni's multiple comparison tests as a *Post hoc* testing (GraphPad Prism version 5.00 for Windows, GraphPad Software, San Diego California USA, www.graphpad.com). Differences of p value <0.05 were designated as significant.

## Results

### 2-AA reduces ATP synthesis rate and energy production gene expression in skeletal muscle without significantly altering high-energy phosphates or pH

*In vivo* and *ex vivo* NMR magnetic spectroscopy allows measurements of physiological and metabolic biomarkers in intact systems [35], [36]. We used *in vivo*  $^{31}\text{P}$  NMR to assess the rate of



**Table 3.** Differential expression of key metabolic genes in skeletal muscle from 2-AA treated mice versus untreated control mice.

| Gene Bank Accession No. | Name of Gene                                                                                  | Gene Symbol       | GO Biological Process                    | Fold Change | p-value |
|-------------------------|-----------------------------------------------------------------------------------------------|-------------------|------------------------------------------|-------------|---------|
| BB345784                | Insulin receptor substrate 1                                                                  | Irs1              | Insulin signaling                        | -6.225      | 0.0382  |
| NM_010514               | insulin-like growth factor 2                                                                  | Igf2              | Insulin signaling                        | -2.23       | 0.0309  |
| BG092290                | insulin-like growth factor 2 receptor                                                         | Igf2r             | Insulin signaling                        | -3.119      | 0.0106  |
| NM_008344               | insulin-like growth factor binding protein 6                                                  | Igfbp6            | Insulin signaling                        | -3.832      | 0.0137  |
| BF225802                | insulin-like growth factor binding protein 5                                                  | Igfbp5            | Insulin signaling                        | -3.208      | 0.0372  |
| BB787243                | insulin-like growth factor binding protein 4                                                  | Igfbp4            | Insulin signaling                        | -8.463      | 0.0076  |
| AV257512                | insulin induced gene 2                                                                        | Insig2            | Insulin signaling                        | -2.768      | 0.0212  |
| AB008453                | solute carrier family 2 (facilitated glucose transporter), member 4                           | Slc2a4 or GLUT4   | Glucose transport                        | -4.399      | 0.0438  |
| NM_133249               | peroxisome proliferative activated receptor, gamma, coactivator 1 beta                        | Ppargc1b (PGC-1β) | Lipid metabolism                         | -2.904      | 0.00823 |
| NM_011146               | peroxisome proliferator activated receptor gamma                                              | Pparg (PPAR-γ)    | Lipid metabolism                         | -18.38      | 0.00256 |
| AI645527                | uncoupling protein 3 (mitochondrial, proton carrier)                                          | Ucp3              | Mitochondrial uncoupling; proton leakage | +5.291      | 0.00213 |
| AW108044                | uncoupling protein 2 (mitochondrial, proton carrier)                                          | Ucp2              | Mitochondrial uncoupling; proton leakage | -2.3        | 0.00274 |
| NM_019812               | sirtuin 1 ((silent mating type information regulation 2, homolog) 1 ( <i>S. cerevisiae</i> )) | Sirt1             | muscle development                       | -2.3        | 0.043   |

Values are the relative expression intensity of the 2-AA treated versus control mice after 4 d. Gene annotations for biological functions are from the Gene Ontology Consortium and the Ingenuity database.

(+) Upregulation of genes compared with control untreated muscle.

(-) Downregulation of genes compared with control untreated muscle.

doi:10.1371/journal.pone.0074528.t003

ATP synthesis, and whether 2-AA alters muscle concentrations of high-energy phosphates as a function of perturbed mitochondrial function.

The levels of phosphomonoesters and inorganic phosphate and the ratio Pi/PCr were decreased in the 2-AA treated mice versus the control mice, whereas the levels of PCr were somewhat higher in the 2-AA versus the controls, but not significantly. The intramyocellular pH was not significantly different in the experimental versus control animals ( $7.26 \pm 0.06$  and  $7.30 \pm 0.05$ , respectively ( $p = 0.60$ )).

$^{31}\text{P}$  NMR spectra were acquired from control and 2-AA treated mice at day 4, before and after saturation of the  $\gamma$ -ATP resonance. Figure 1 shows the summed spectra (non-saturated (A)), upon saturation of the  $\gamma$ -ATP peak (B) with the difference spectrum (A-B) from the 6 control and the 6 2-AA-treated mice, with the mean results presented in Table 1. The synthesis rates were derived from the NMR data and the ATP concentration assays, with both analyses demonstrating significantly decreased ATP levels in the 2-AA versus the control mice. The fractional change,  $\Delta M/M_0$ , and the observed spin lattice relaxation time,  $T_{1app}$ , were used to calculate the  $K_f$  rate constant using the equation  $k_f = \frac{1}{T_{1app}} \times \frac{\Delta M(Pi)}{M_0(Pi)}$  for the Pi  $\rightarrow$   $\gamma$ -ATP reaction or  $k_f = \frac{1}{T_{1app}} \times \frac{\Delta M(PCr)}{M_0(PCr)}$  for the PCr  $\rightarrow$   $\gamma$ -ATP reaction. The ATP synthesis rate was obtained as the product of  $K_f$  and Pi concentration. The NMR-measured fractional change for the Pi  $\rightarrow$   $\gamma$ -ATP reaction  $\Delta M/M_0$  decreased by 30.6% in the 2-AA mice versus the controls (percent change in  $\Delta M/M_0$ , Table 1). The ATP concentration was lower in 2-AA mice versus controls by approximately 81% ( $p < 0.001$  in the unidirectional (one-tailed) t-test (Table 1). Likewise, the ATP synthesis rate was reduced by

90% in the 2-AA versus control mice ( $p < 0.001$  unidirectional (one-tailed) t-test). Accordingly, the unidirectional ATP synthesis rate for the PCr  $\rightarrow$   $\gamma$ -ATP reaction was significantly decreased by 82% in the 2-AA versus control mice (one-tailed t-test,  $p < 0.001$ ).

Figure 2 presents the transcriptome results for the expression of energy production (Fig. 2A) and intermediate metabolism (Fig. 2B) genes, and demonstrates their expression was lower in the skeletal muscle of the 2-AA versus control mice. Several components of the mitochondrial respiratory (proton transport and/or electron transport) chain were down-regulated, including subunits of NADH dehydrogenases and ATP synthase ( $F_1F_0$  ATPase or complex V). Also genes involved in oxidative phosphorylation and genes for acetyl-coA biosynthesis from pyruvate (Fig. 2B) were significantly down-regulated. Moreover, the downstream TCA cycle genes, including pyruvate dehydrogenase (lipoamide) beta, succinate dehydrogenase subunits, and citrate synthase were down-regulated. These results strongly suggest that 2-AA leads to metabolic dysfunction in skeletal muscle.

### 2-AA increases insulin resistance biomarker IMCLs and reprograms the expression of key metabolic genes

IMCL levels [42], [43] can serve as useful indices of insulin resistance/metabolic abnormalities in non-vertebrates [44], and vertebrates [45–47], including obese and/or type 2 diabetic patients, where increased IMCL levels are due to impaired insulin-stimulated glucose uptake [37], [48], [49]. Figure 3 shows representative  $^1\text{H}$ -NMR spectra from control and 2-AA mice. These results demonstrate a notable rise in IMCLs after 2-AA treatment. Quantitative results of these data (Table 2) demonstrate a significant rise in ICML 4 days post 2-AA treatment. Correspondingly, the expression of genes involved in insulin signaling (i.e., IRS1) and glucose transport (i.e., GLUT4) were down-

regulated (Table 3). Table 3 also lists genes whose altered expression in skeletal muscle post 2-AA treatment could lead to metabolic dysfunction, including down-regulation of the PGC-1 $\beta$ , PPAR- $\gamma$  lipid metabolism genes, the UCP2 mitochondrial uncoupling: proton leakage gene, and Sirt1, which has been proposed to lie at the center of a loop regulating the actions of PGC and PPARs [50]; and up-regulation of the UCP3 mitochondrial uncoupling: proton leakage gene. Furthermore, the protein expression level of PGC-1 $\beta$ , PPAR- $\gamma$  and Sirt1 was significantly dampened in mouse skeletal muscle cell line C2C12 (Fig. 4) following 2-AA treatment, corroborating with our mouse transcriptome data. This dampening effect was not due to 2-AA cytotoxicity (Fig. 5).

Table 4 and Figure 2B show that 2-AA also alters fatty acid oxidation. Several genes involved in lipid metabolism were down-regulated (Fig. 2B). Eleven fatty acid oxidation genes were differentially expressed post 2-AA treatment, with most being down-regulated (Table 4). These genes encode proteins that increase the non-esterified fatty acids cytosolic pool, and function in fatty acid  $\beta$ -oxidation. Their reduced expression could contribute to muscle lipid accumulation and the lipid metabolism dysfunction produced by 2-AA. Plasma FFAs were not altered by 2-AA treatment.

In addition to this, the transcriptome data shows that stress activated protein kinase (SAPK) pathway genes are significantly downregulated (Table 5) in mouse skeletal muscle at 4 days 2-AA treatment. Therefore, it confirms the specific action of 2-AA in skeletal muscle.

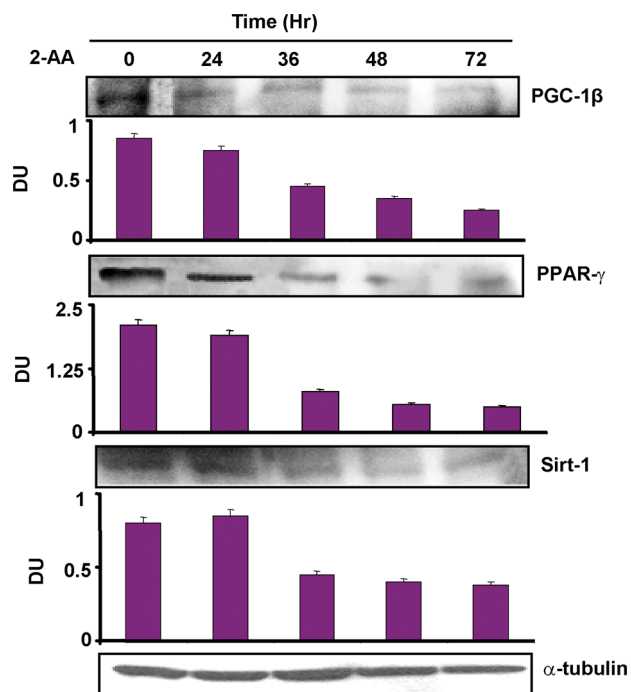

**Figure 4. 2-AA treatment dampens key metabolic protein levels in mouse skeletal muscle cells.** Western blotting of cellular extracts with specific antibodies of PGC-1 $\beta$ , PPAR- $\gamma$  and Sirt-1 in 2-AA treated cells at the indicated time points. One representative experiment (out of three) is shown. Loading was normalized relative to mouse  $\alpha$ -tubulin. Densitometric data are the average of three replicate experiments and are expressed as mean  $\pm$  SD (vertical bars). \* $p$ <0.05 vs. naïve. DU, densitometric units. doi:10.1371/journal.pone.0074528.g004

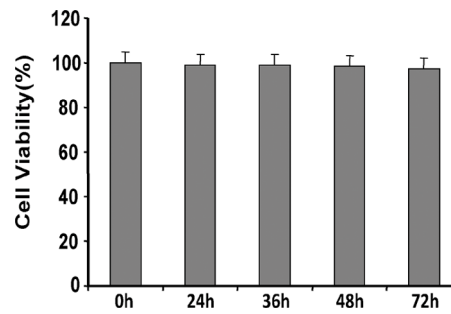

**Figure 5. Effects of 2-AA on viability of mouse muscle cells.** MTT assay measuring cell viability in mouse skeletal muscle cells (C2C12) after treatment with 0.8 mM 2-AA over time, as indicated in the figure. SDs (vertical bars) were calculated from three replicate experiments. doi:10.1371/journal.pone.0074528.g005

### 2-AA affects skeletal muscle function

Since 2-AA reduces ATP synthesis rate and energy production gene expression in skeletal muscle while reprograms the expression of key metabolic genes as presented above, we carried out further analysis and physiological studies to directly examine whether the 2-AA effects on metabolic gene expression and ATP synthesis impact muscle function. Our results show that the expression of all muscle contraction-related genes is significantly down regulated (Table 6 and Fig. 6) as well as muscle development-related genes (Fig. 6) indicating thus muscle dysfunction 4 days after 2AA treatment. In addition, Table 7 shows that at 4 days post 2-AA treatment, the absolute twitch tension of tibialis muscle was significantly reduced in the 2-AA versus the control mice. The evoked first single twitch tensions of tibialis muscle during TOF stimulation in the 2-AA mice were reduced to 72% on the left side and 80% on the right side, compared to the control mice ( $p$ <0.05). The maximum response of tetanic stimulation (Tmax) also was significantly different on the left side of 2-AA mice decreased 75% versus the controls.

### Discussion

We show here that 2-AA, a diagnostically important bacterial interkingdom infochemical, leads to skeletal muscle dysfunction, and induces a biological signature of mitochondrial dysregulation and insulin resistance. Our results demonstrate that 2-AA down-regulates genes, including PPAR- $\gamma$ , PGC-1 $\beta$  and Sirt1 that function in mitochondrial biogenesis, oxidative phosphorylation, and metabolic pathways, including insulin signaling, glucose transport, energy production, fatty acid oxidation, and skeletal muscle function. PPARs, in conjunction with PGC-1 and Sirt1, activate oxidative metabolism genes, and mediate insulin sensitivity in skeletal muscle; and their dysregulation could underlie metabolic dysfunction [50]. Such down-regulation may be mediated via an upstream regulatory pathway involving mitochondrial uncoupling, and ultimately lead to the skeletal muscle dysfunction observed here, and in burned skeletal muscle [35], [36], [51]. To our knowledge, 2-AA is the first QS molecule seen to promote these effects.

The 2-AA mediated suppression of PPAR- $\gamma$  correlates with the reduced rate of ATP synthesis in the skeletal muscle of 2-AA treated mice (Fig. 1 and Table 1), as well as the downregulation of glucose transporter and insulin signaling genes (Table 3). The transcription factor PPAR- $\gamma$  plays a pivotal role in maintaining oxidative phosphorylation, insulin-mediated signaling, and glucose homeostasis, along with other co-activators like PGC-1 and Sirt-1



**Table 4.** Differential expression of genes involved in fatty acid oxidation in mouse skeletal muscle at 4 days 2-AA treatment versus control muscle.

| Gene Bank Accession No. | Gene Name                                                                         | Fold Change | p- value |
|-------------------------|-----------------------------------------------------------------------------------|-------------|----------|
| BG060909                | stearoyl-Coenzyme A desaturase 2                                                  | +10.69      | 0.00507  |
| NM_009127               | stearoyl-Coenzyme A desaturase 1                                                  | -4.379      | 0.0249   |
| NM_010726               | phytanoyl-CoA hydroxylase                                                         | -4.708      | 0.000639 |
| NM_010726               | phytanoyl-CoA hydroxylase                                                         | -4.708      | 0.000639 |
| AK017272                | lipoprotein lipase                                                                | -8.606      | 0.00755  |
| AK017272                | lipoprotein lipase                                                                | -8.606      | 0.00755  |
| AK017272                | lipoprotein lipase                                                                | -8.606      | 0.00755  |
| AK017272                | lipoprotein lipase                                                                | -8.606      | 0.00755  |
| BB114220                | L-3-hydroxyacyl-Coenzyme A dehydrogenase, short chain                             | -6.56       | 0.002    |
| AV018774                | L-3-hydroxyacyl-Coenzyme A dehydrogenase, short chain                             | -5.24       | 0.00184  |
| NM_008212               | L-3-hydroxyacyl-Coenzyme A dehydrogenase, short chain                             | -5.945      | 0.0167   |
| NM_010023               | dodecenoyl-Coenzyme A delta isomerase (3,2 trans-enoyl-Coenzyme A isomerase)      | -5.248      | 0.00263  |
| AK002555                | acetyl-Coenzyme A acyltransferase 2 (mitochondrial 3-oxoacyl-Coenzyme A thiolase) | -4.842      | 0.0126   |
| AK002555                | acetyl-Coenzyme A acyltransferase 2 (mitochondrial 3-oxoacyl-Coenzyme A thiolase) | -7.626      | 0.00187  |
| NM_133249               | peroxisome proliferative activated receptor, gamma, coactivator 1 beta            | -2.904      | 0.00823  |

(+) Upregulation of genes compared with control untreated muscle.

(-) Downregulation of genes compared with control untreated muscle.

doi:10.1371/journal.pone.0074528.t004

[50], [52–54]. As such, our results suggest that PPAR- $\gamma$  suppression could affect energy homeostasis and insulin-induced glucose metabolism in skeletal muscle, which could then cause mitochondrial dysfunction and insulin resistance [55], [56]. Indeed, PPAR- $\gamma$  downregulation in CF deficient cells leads to chronic inflammation [24], [57]. Also, PPAR- $\gamma$  overexpression can rescue mitochondrial dysfunction in chronic mitochondrial disease [58].

That 2-AA down-regulates PGC-1 $\beta$  and upregulates UCP3 (Table 3) is consistent with its reduction of ATP synthesis rate and down-regulation of PPAR- $\gamma$ . The PGC-1 $\beta$  protein plays a major role in mitochondrial metabolism, as it increases mitochondrial biogenesis and muscle cell respiration [8]; and is hypothesized to have a central role in regulating energy homeostasis and metabolism [23], [35], [36]. As such, PGC-1 $\beta$  down-regulation could lead to the down-regulation of oxidative phosphorylation genes (OXPHOS) [35], [36], as their expression is down-regulated by 2-AA (Fig. 2A). Consequently, these changes could lead to mitochondrial uncoupling, as suggested by the up-regulation of

UCP3 (Table 3). To this end, our data suggest that 2-AA dysregulates components of mitochondrial metabolism at the transcriptional level, to result in skeletal muscle dysfunction (Table 6–7). Interestingly, PPAR- $\gamma$  was suggested to act as the N-acyl-homoserine lactone (AHL) signaling molecule N-3-oxododecanoyl homoserine lactone (3-oxo-C<sub>12</sub>-HSL) mammalian receptor and it is shown to function as an antagonist of PPAR- $\gamma$  transcriptional activity and inhibit the DNA binding ability of PPAR- $\gamma$  [59].

Cells overexpressing PGC-1 $\beta$  exhibit increased activity of ATP consuming reactions [8]. Here downregulation of PGC-1 $\beta$  coincides with reduced ATP synthesis rate. That 2-AA also reduces IRS1 expression (Table 3) suggests that PGC-1 $\beta$ , which is downregulated here, perturbs IRS1 expression, and consequently effects insulin resistance in skeletal muscle. As such, PGC-1 may contribute to insulin resistance to then mediate inflammation and disrupt glucose homeostasis [13]. In addition, the 2-AA mediated down-regulation of Sirt1 (Table 3) is possibly associated with energy expenditure and insulin sensitivity, and likely reflects the

**Table 5.** Downregulation of stress activated protein kinase (SAPK) pathway genes in mouse skeletal muscle at 4 days 2-AA treatment versus control muscle.

| Gene Bank Accession No. | Gene Name                                                          | Fold Change | p-value |
|-------------------------|--------------------------------------------------------------------|-------------|---------|
| BM119623                | activating transcription factor 2                                  | -2.160      | 0.0335  |
| BG071068                | guanine nucleotide binding protein (G protein), beta polypeptide 1 | -2.770      | 0.0165  |
| AV021455                | guanine nucleotide binding protein (G protein), gamma 2            | -4.480      | 0.0199  |
| BQ175363                | mitogen-activated protein kinase kinase kinase 9                   | -8.400      | 0.00541 |
| NM_009582               | mitogen-activated protein kinase kinase kinase 12                  | -2.012      | 0.0455  |
| AF220195                | mitogen-activated protein kinase 8 interacting protein 2           | -62.110     | 0.0116  |
| AF262046                | mitogen-activated protein kinase 8 interacting protein 3           | -3.759      | 0.0119  |

(-) Downregulation of genes compared with control untreated muscle.

doi:10.1371/journal.pone.0074528.t005

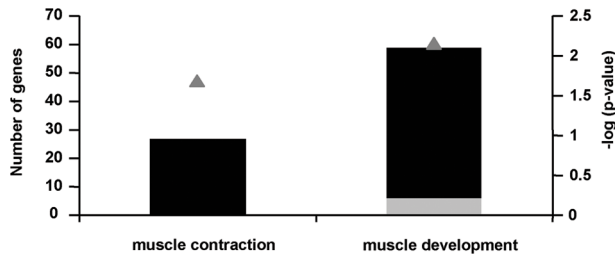

**Figure 6. 2-AA treatment down-regulates muscle function.** Black bars indicate the number of down-regulated genes; gray bars indicate the number of up-regulated genes, in the skeletal muscle of mice 4 days post 2-AA treatment versus control mice (left vertical axis). The negative log<sub>10</sub> of p-values represented by gray triangles are indicated on the right vertical axis. doi:10.1371/journal.pone.0074528.g006

impaired mitochondrial function [60]. The pleiotropic transcription factor PGC-1 functions in the regulation of differential gene expression, in conjunction with other transcription factors (e.g., PPAR, SIRT-1), in cells exhibiting high energy-demands, including skeletal muscle [8], [60], [61]. Here, 2-AA down-regulates PGC-1 $\beta$ , IRS1, IGFs and GLUT4 expression (Table 3), indicating

a connection between PGC-1 $\beta$  and metabolic genes. This suggests that PGC-1 $\beta$  acts to regulate energy metabolism genes in skeletal muscle, and that mitochondrial dysfunction leads to the down-regulation of the insulin signaling pathway, and impaired systemic insulin activity (Fig. 7). To this end, our findings suggest a more general role for PGC-1 $\beta$  in skeletal muscle metabolism, and possibly in the progression of chronic infection [62], in addition to the insulin resistance seen in obese and/or type 2 diabetic patients [48], [49], [63], and CF patients with a high incidence of diabetes [25].

2-AA also downregulates genes involved in fatty acid oxidation, energy production, intermediary metabolism, and the TCA cycle (Table 4; Fig. 2b). This downregulation could in turn lead to a demand for increased muscle contractile gene expression to fulfill functional requirements; however, our results show that 2-AA reduces the expression of these genes (Fig. 6). This reduction could underlie the observed muscle function impairment (Table 7), and correspond to the impaired muscle strength in CF patients [64]. Our data suggest that this functional impairment may be due to reduced mitochondrial coupling, as both ATP synthesis and TCA flux are reduced, and the ratio of ATP synthesis and TCA flux can serve as an index of mitochondrial coupling [37].

*In vivo* <sup>31</sup>P magnetization-transfer can non-invasively determine the unidirectional flux of P<sub>i</sub> to ATP (“ATP synthesis”), and has

**Table 6.** Downregulation of muscle contraction genes in mouse skeletal muscle at 4 days 2-AA treatment versus control muscle.

| Gene Bank Accession No. | Gene Name                                                            | Fold Change | p-value |
|-------------------------|----------------------------------------------------------------------|-------------|---------|
| AK003186                | tropomyosin 2, beta                                                  | -2.822      | 0.0291  |
| NM_010867               | myomesin 1                                                           | -6.41       | 0.0203  |
| BM246564                | phosphodiesterase 4B, cAMP specific                                  | -2.161      | 0.0488  |
| AK002271                | tropomyosin 1, alpha                                                 | -3.175      | 0.021   |
| BI248947                | caldesmon 1                                                          | -5.736      | 0.0334  |
| BC003284                | WD repeat domain 21                                                  | -3          | 0.0288  |
| BC024358                | tropomyosin 2, beta                                                  | -3.439      | 0.0359  |
| AY094172                | calcium channel, voltage-dependent, beta 1 subunit                   | -2.317      | 0.0211  |
| AA245637                | ATPase, Ca <sup>++</sup> transporting, cardiac muscle, slow twitch 2 | -2.121      | 0.0402  |
| X53753                  | tropomyosin 3, gamma                                                 | -2.399      | 0.0426  |
| BC025840                | titin                                                                | -2.281      | 0.0397  |
| AK013026                | annexin A6                                                           | -2.847      | 0.00242 |
| AK010153                | titin                                                                | -3.873      | 0.0149  |
| AW558570                | endothelin receptor type A                                           | -4.527      | 0.0147  |
| BB288010                | myomesin 2                                                           | -14.32      | 0.0221  |
| BB705075                | Calponin 3, acidic (Cnn3), mRNA                                      | -2.413      | 0.0044  |
| BM122177                | titin                                                                | -2.901      | 0.0328  |
| BB478751                | titin                                                                | -3.778      | 0.0137  |
| NM_033268               | actinin alpha 2                                                      | -4.234      | 0.0349  |
| BC026142                | myosin, heavy polypeptide 11, smooth muscle                          | -3.538      | 0.00149 |
| NM_022314               | tropomyosin 3, gamma                                                 | -2.607      | 0.0251  |
| BB474208                | myomesin 2                                                           | -8.349      | 0.039   |
| BI663014                | calponin 2                                                           | -2.342      | 0.00402 |
| BB833102                | calponin 3, acidic                                                   | -3.216      | 0.0354  |
| AW108242                | RIKEN cDNA 8030451F13 gene                                           | -2.775      | 0.0286  |
| BM232388                | tropomyosin 1, alpha                                                 | -4.137      | 0.00079 |
| AV241307                | myomesin 2                                                           | -10.55      | 0.0258  |

(-) Downregulation of genes compared with control untreated muscle. doi:10.1371/journal.pone.0074528.t006

**Table 7.** Absolute wet-weights of tibialis (TA), soleus (So) and gastrocnemius (GC) muscles, and absolute twitch tensions (ST; single twitch,  $T_{max}$ : maximum response of tetanic stimulation at 50 Hz for 5 sec) of tibialis muscle, at 4 days post 2-AA treatment, versus corresponding control muscle.

| Wet weight (mg) and twitch height (g) | Control                      |                             | 2-AA                        |                             |
|---------------------------------------|------------------------------|-----------------------------|-----------------------------|-----------------------------|
|                                       | Left                         | Right                       | Left                        | Right                       |
| TA                                    | 54.0±3.2                     | 54.7±2.4                    | 45.7±3.5                    | 47.3±2.2                    |
| So                                    | 8.1±0.8                      | 8.0±0.5                     | 7.8±0.3                     | 8.4±0.8                     |
| GC                                    | 153.0±8.3                    | 152.7±6.4                   | 141.3±8.1                   | 143.0±8.0                   |
| ST                                    | <b>44.6±1.3<sup>§</sup></b>  | <b>45.0±1.7<sup>†</sup></b> | <b>32.2±3.4<sup>§</sup></b> | <b>35.8±1.9<sup>†</sup></b> |
| $T_{max}$                             | <b>121.0±7.0<sup>†</sup></b> | 118.7±5.0                   | <b>90.9±7.0<sup>†</sup></b> | 98.5±4.3                    |
| N                                     | 6                            |                             | 6                           |                             |

Values are means ± SEM. Differences between the two sides of the 2-AA group and control group were compared using one-way ANOVA test and Bonferroni's multiple comparison as a *Post hoc* testing. Differences were assumed to be significant if the p-value was <0.05. There are no significant differences in wet muscle weights between the experimental and control mice ( $p>0.05$ ). The twitch heights of single twitch stimulation and tetanic stimulation show significant differences between control and 2-AA mice ( $p<0.05$ ).

<sup>§</sup>Significant difference of single twitch height between control and 2-AA group in left side ( $p = 0.043$ ).

<sup>†</sup>Significant difference of single twitch height between control and 2-AA group in right side ( $p = 0.047$ ).

<sup>†</sup>Significant difference of maximum response of titanic stimulation between control and 2-AA group in left side ( $p = 0.011$ ).

Lt: Left side of muscle.

Rt: Right side of muscle.

doi:10.1371/journal.pone.0074528.t007

been used to show that abnormal mitochondrial function occurs in obesity and diabetes [37]. This technique [65], [66] has enabled us to noninvasively measure fast enzyme reaction exchange rates, to provide an index of the net skeletal muscle rate of oxidative ATP synthesis catalyzed by mitochondrial ATPase. This is by definition proportional to the oxygen consumption rate by the P/O ratio, e.g., the ratio of the net rate of ATP synthesis by oxidative phosphorylation to the rate of oxygen consumption [67],[68]. Unidirectional ATP synthesis flux, measured by NMR, is thought to primarily reflect flux through  $F_1F_0$ -ATP synthase, with negligible influence of the coupled glyceraldehyde-3-phosphate dehydrogenase (G3PDH), or phosphoglycerate kinase (PGK) reactions [66]. Although the net glycolytic contribution of G3PDH and PGK to ATP production is small, versus oxidative phosphorylation, these enzymes occur at near equilibrium, allowing high unidirectional ATP production. As such, we assume the contribution of glycolytic reactions to unidirectional ATP synthesis flux is negligible.

IMCLs levels are increased in mouse gastrocnemius muscle following 2-AA treatment, as assessed by HRMAS  $^1H$  NMR spectroscopy (Table 2 and Fig 3). Although the source of these accumulated lipids is beyond this study, it has been shown that EMCLs, IMCLs, and triglycerides all contribute to cellular lipid peaks [42], [69], [70]. IMCL probably serve as energy substrates for oxidative metabolism [71], and can be mobilized and utilized with turnover rates of several hours [72]. Furthermore, the lipid peak at 1.4 ppm in Figure 3 is attributed to methylene protons of intra-myocellular triglyceride acyl chains, primarily due to IMCL [42], to suggest that the increase in NMR-visible lipids at 1.4 ppm post 2-AA treatment is primarily due to increased IMCL. This is further supported by human studies [73],[74] where IMCLs were

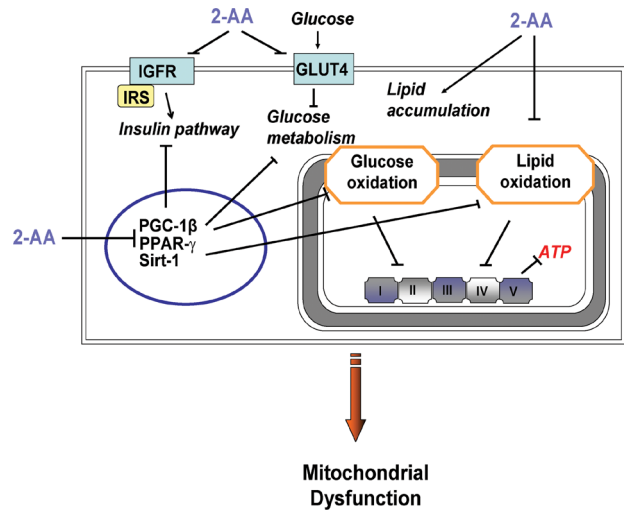

**Figure 7. Schematic model for 2-AA mediated molecular mechanisms of mitochondrial dysfunction in skeletal muscle.**

2-AA triggers mitochondrial dysfunction via the down-regulation of peroxisome proliferative activated receptor, gamma, coactivator (PGC)-1β, peroxisome proliferator activated receptor (PPAR)-γ, sirtuin (Sirt)-1, the insulin signaling pathway, overall energy metabolism, and increased lipid accumulation.

doi:10.1371/journal.pone.0074528.g007

suggested to serve as metabolic biomarkers of insulin resistance. Nevertheless, lipid accumulation may reflect increased inflammation versus mitochondrial dysfunction [13], although 2-AA immunomodulation is characterized by decreased inflammation [31]. Here, increased IMCLs were associated with altered expression of key regulators of insulin signaling and glucose metabolism (Table 3), which can lead to insulin resistance in association with mitochondrial dysfunction. To this end, 2-AA might mediate insulin resistance, as IMCLs are biomarkers of such resistance, and it down-regulates IRS1, IGFs, and GLUT4. Nevertheless we have not directly demonstrated insulin resistance by traditional methods.

Although the exact mechanism of abnormal insulin function is unknown, there is increasing evidence that plasma FFAs may act to induce insulin resistance [75]. However, intramyocellular accumulation of toxic FFA metabolites, *i.e.* fatty acyl-coenzyme A, diacylglycerol, and ceramides, has been also shown to impair insulin signal transduction, glucose transport/phosphorylation, and glycogen synthesis [46], [75], [76]. Because fatty acid metabolism and glucose levels are closely linked, we propose that the observed accumulation of lipids or triglycerides in muscle, may lead to insulin resistance [77], although we did not observe any alteration in plasma FFA, in agreement with the unchanged FFA levels in CF patients [25]. In addition, previous studies have suggested that muscle activity of lipoprotein lipase (LPL) is related to insulin resistance [78] and that insulin may downregulate the activity of lipoprotein lipase in skeletal muscle [79]. This is in accordance with the decreased expression of the LPL gene in the skeletal muscle of the 2-AA treated mice (Table 4).

CF patients often develop skeletal muscle wasting [80], and insulin resistance [25], [81]. 2-AA mediated downregulation of muscle gene functions is associated with tissue loss and low ATP synthesis rate in skeletal muscle. Our results suggest that 2-AA may act as an important contributor of host metabolic alterations in disease states characterized by chronic infection. CF is one such syndrome, where the associated pathophysiology stems as much from the underlying gene mutation as from the colonization and

adaptation of particular flora in the mucosal pulmonary milieu [82]. In acute infections, metabolic alterations are short-lived and reverse quickly [83], [84], whereas in chronic infections the protracted metabolic response leads to muscle wasting [85], [86]. *P. aeruginosa* and 2-AA in chronically infected CF lungs is considered pathognomonic [32], [33], [87], [88]. As such, further investigation into the potential clinical significance of 2-AA is warranted, 2-AA modulates immune responses to promote host tolerance and chronic infection [31]. To this end, it is possible that the 2-AA mediated changes of the host metabolome may further contribute to host tolerance and chronic *P. aeruginosa* infection. Indeed, inhibition of PPAR- $\gamma$  reduces the phagocytic activity of macrophages [89], which may serve to evade the host defense mechanism, and possibly favor infection and allow long term bacterial presence promoted by 2-AA [31]. Our results are consistent with other chronic infections, including HIV [90], tuberculosis [91], chronic *Escherichia coli* in skeletal muscle [92], and chronically infected CF patients [93].

## Conclusion

Based on our multidisciplinary results, Figure 7 proposes a novel mode of action for the bacterial pathogen infochemical, 2-AA, to mediate host metabolic dysregulation that results in mitochondrial

dysfunction, and potentially insulin resistance, in skeletal muscle. The metabolic changes promoted by 2-AA may be clinically relevant in molecular medicine in general, and CF in particular, as: a) ATP synthesis rate and IMCLs can be measured clinically using non-invasive and non-irradiating metabolomic assays; b) PGC-1 $\beta$  activity may be induced; and c) PGC-1 $\beta$  agonists may alleviate insulin resistance and prevent damage in organs remote from the infection site. In addition, our results provide further insights into the molecular and metabolic processes mediated by 2-AA that accompany infections caused by 2-AA producing pathogens, including *Pseudomonas aeruginosa* and *Burkholderia* species [32], [33], as well as 2-AA-related molecules produced by other pathogens.

## Acknowledgments

We would like to thank all the lab members for their valuable suggestions.

## Author Contributions

Conceived and designed the experiments: AAT LGR. Performed the experiments: CC AB NP SL MM. Analyzed the data: AAT CC AB LGR. Contributed reagents/materials/analysis tools: AAT JAVM RGT LGR. Wrote the paper: AAT AB LGR.

## References

- Manes S, del Real G, Martinez AC (2003) Pathogens: raft hijackers. *Nat Rev Immunol* 3: 557–568.
- Alonso A, Garcia-del Portillo F (2004) Hijacking of eukaryotic functions by intracellular bacterial pathogens. *Int Microbiol* 7: 181–191.
- Jiang JH, Tong J, Gabriel K (2012) Hijacking mitochondria: bacterial toxins that modulate mitochondrial function. *IUBMB Life* 64: 397–401.
- Arnoult D, Soares F, Tattoli I, Girardin SE (2011) Mitochondria in innate immunity. *EMBO Rep* 12: 901–910.
- Trumppower BL (1990) Cytochrome bc<sub>1</sub> complexes of microorganisms. *Microbiol Rev* 54: 101–129.
- Van Ark G, Berden JA (1977) Binding of HQNO to beef-heart submitochondrial particles. *Biochim Biophys Acta* 459: 119–127.
- Amar J, Burcelin R, Ruidavets JB, Cani PD, Fauvel J, et al. (2008) Energy intake is associated with endotoxemia in apparently healthy men. *Am J Clin Nutr* 87: 1219–1223.
- St-Pierre J, Lin J, Krauss S, Tarr PT, Yang R, et al. (2003) Bioenergetic analysis of peroxisome proliferator-activated receptor gamma coactivators 1alpha and 1beta (PGC-1alpha and PGC-1beta) in muscle cells. *J Biol Chem* 278: 26597–26603.
- Scarpulla RC (2002) Nuclear activators and coactivators in mammalian mitochondrial biogenesis. *Biochim Biophys Acta* 1576: 1–14.
- Kelly DP, Scarpulla RC (2004) Transcriptional regulatory circuits controlling mitochondrial biogenesis and function. *Genes Dev* 18: 357–368.
- Schroder K, Tschopp J (2010) The inflammasomes. *Cell* 140: 821–832.
- Davis BK, Wen H, Ting JP (2011) The inflammasome NLRs in immunity, inflammation, and associated diseases. *Annu Rev Immunol* 29: 707–735.
- Tschopp J (2011) Mitochondria: Sovereign of inflammation? *Eur J Immunol* 41: 1196–1202.
- Zhou R, Yazdi AS, Menu P, Tschopp J (2011) A role for mitochondria in NLRP3 inflammasome activation. *Nature* 469: 221–225.
- Ichinohe T, Pang IK, Iwasaki A (2010) Influenza virus activates inflammasomes via its intracellular M2 ion channel. *Nat Immunol* 11: 404–410.
- Ilyinskii PO, Gabai VL, Sunyaev SR, Thoidis G, Sheider AM (2007) Toxicity of influenza A virus matrix protein 2 for mammalian cells is associated with its intrinsic proton-channeling activity. *Cell Cycle* 6: 2043–2047.
- Beisel WR (1975) Metabolic response to infection. *Annu Rev Med* 26: 9–20.
- Lowell BB, Shulman GI (2005) Mitochondrial dysfunction and type 2 diabetes. *Science* 307: 384–387.
- Maechler P, Wollheim CB (2001) Mitochondrial function in normal and diabetic beta-cells. *Nature* 414: 807–812.
- Krauss S, Zhang CY, Lowell BB (2005) The mitochondrial uncoupling-protein homologues. *Nat Rev Mol Cell Biol* 6: 248–261.
- Boden G, Shulman GI (2002) Free fatty acids in obesity and type 2 diabetes: defining their role in the development of insulin resistance and beta-cell dysfunction. *Eur J Clin Invest* 32 Suppl 3: 14–23.
- Spiegelman BM, Heinrich R (2004) Biological control through regulated transcriptional coactivators. *Cell* 119: 157–167.
- Sandri M, Lin J, Handschin C, Yang W, Arany ZP, et al. (2006) PGC-1alpha protects skeletal muscle from atrophy by suppressing FoxO3 action and atrophy-specific gene transcription. *Proc Natl Acad Sci U S A* 103: 16260–16265.
- Dekkers JF, van der Ent CK, Kalkhoven E, Beekman JM (2012) PPARgamma as a therapeutic target in cystic fibrosis. *Trends Mol Med* 18: 283–291.
- Hardin DS, Leblanc A, Marshall G, Seilheimer DK (2001) Mechanisms of insulin resistance in cystic fibrosis. *Am J Physiol Endocrinol Metab* 281: E1022–1028.
- Navon-Venezia S, Ben-Ami R, Carmeli Y (2005) Update on *Pseudomonas aeruginosa* and *Acinetobacter baumannii* infections in the healthcare setting. *Curr Opin Infect Dis* 18: 306–313.
- Kerr KG, Snelling AM (2009) *Pseudomonas aeruginosa*: a formidable and ever-present adversary. *J Hosp Infect* 73: 338–344.
- Ng WL, Bassler BL (2009) Bacterial quorum-sensing network architectures. *Annu Rev Genet* 43: 197–222.
- Keller L, Surette MG (2006) Communication in bacteria: an ecological and evolutionary perspective. *Nat Rev Microbiol* 4: 249–258.
- Rumbaugh KP, Kaufmann GF (2011) Exploitation of host signaling pathways by microbial quorum sensing signals. *Curr Opin Microbiol*.
- Bandyopadhyaya A, Kesarwani M, Que YA, He J, Padfield K, et al. (2012) The quorum sensing volatile molecule 2-amino acetophenone modulates host immune responses in a manner that promotes life with unwanted guests. *PLoS Pathog* 8: e1003024.
- Cox CD, Parker J (1979) Use of 2-aminoacetophenone production in identification of *Pseudomonas aeruginosa*. *J Clin Microbiol* 9: 479–484.
- Scott-Thomas AJ, Syhre M, Pattemore PK, Epton M, Laing R, et al. (2010) 2-Aminoacetophenone as a potential breath biomarker for *Pseudomonas aeruginosa* in the cystic fibrosis lung. *BMC Pulm Med* 10: 56.
- Kesarwani M, Hazan R, He J, Que Y, Apidianakis Y, et al. (2011) A quorum sensing regulated small volatile molecule reduces acute virulence and promotes chronic infection phenotypes. *PLoS Pathog* 7: e1002192.
- Astrakas LG, Goljer I, Yasuhara S, Padfield KE, Zhang Q, et al. (2005) Proton NMR spectroscopy shows lipids accumulate in skeletal muscle in response to burn trauma-induced apoptosis. *Faseb J* 19: 1431–1440.
- Padfield KE, Astrakas LG, Zhang Q, Gopalan S, Dai G, et al. (2005) Burn injury causes mitochondrial dysfunction in skeletal muscle. *Proc Natl Acad Sci U S A* 102: 5368–5373.
- Befroy DE, Falk Petersen K, Rothman DL, Shulman GI (2009) Assessment of in vivo mitochondrial metabolism by magnetic resonance spectroscopy. *Methods Enzymol* 457: 373–393.
- Forsen S, Hoffman R (1963) Study of moderately rapid chemical exchange reactions by means of nuclear magnetic double resonance. *Journal of Chemical Physics* 39: 2892.
- Cobas JC, Bernstein MA, Martin-Pastor M, Tahoces PG (2006) A new general-purpose fully automatic baseline-correction procedure for 1D and 2D NMR data. *J Magn Reson* 183: 145–151.
- Rees D, Smith MB, Harley J, Radda GK (1989) In vivo functioning of creatine phosphokinase in human forearm muscle, studied by 31P NMR saturation transfer. *Magn Reson Med* 9: 39–52.

41. Morvan D, Demidem A, Papon J, Madelmont JC (2003) Quantitative HRMAS proton total correlation spectroscopy applied to cultured melanoma cells treated by chloroethyl nitrosourea: demonstration of phospholipid metabolism alterations. *Magn Reson Med* 49: 241–248.
42. Szczepaniak LS, Babcock EE, Schick F, Dobbins RL, Garg A, et al. (1999) Measurement of intracellular triglyceride stores by H spectroscopy: validation in vivo. *Am J Physiol* 276: E977–989.
43. Kuhlmann J, Neumann-Haefelin C, Belz U, Kramer W, Juretschke HP, et al. (2005) Correlation between insulin resistance and intramyocellular lipid levels in rats. *Magn Reson Med* 53: 1275–1282.
44. Righi V, Apidianakis Y, Mintzopoulos D, Astrakas L, Rahme LG, et al. (2010) In vivo high-resolution magic angle spinning magnetic resonance spectroscopy of *Drosophila melanogaster* at 14.1 T shows trauma in aging and in innate immune-deficiency is linked to reduced insulin signaling. *Int J Mol Med* 26: 175–184.
45. Tzika AA, Astrakas LG, Cao H, Mintzopoulos D, Zhang Q, et al. (2008) Murine intramyocellular lipids quantified by NMR act as metabolic biomarkers in burn trauma. *Int J Mol Med* 21: 825–832.
46. Krssak M, Falk Petersen K, Dresner A, DiPietro L, Vogel SM, et al. (1999) Intramyocellular lipid concentrations are correlated with insulin sensitivity in humans: a <sup>1</sup>H NMR spectroscopy study. *Diabetologia* 42: 113–116.
47. Jacob S, Machann J, Rett K, Brechtel K, Volk A, et al. (1999) Association of increased intramyocellular lipid content with insulin resistance in lean nondiabetic offspring of type 2 diabetic subjects. *Diabetes* 48: 1113–1119.
48. Goodpaster BH, He J, Watkins S, Kelley DE (2001) Skeletal muscle lipid content and insulin resistance: evidence for a paradox in endurance-trained athletes. *J Clin Endocrinol Metab* 86: 5755–5761.
49. Sinha R, Dufour S, Petersen KF, LeBon V, Enoksson S, et al. (2002) Assessment of skeletal muscle triglyceride content by (<sup>1</sup>H) nuclear magnetic resonance spectroscopy in lean and obese adolescents: relationships to insulin sensitivity, total body fat, and central adiposity. *Diabetes* 51: 1022–1027.
50. Desvergne B, Michalik L, Wahli W (2006) Transcriptional regulation of metabolism. *Physiol Rev* 86: 465–514.
51. Yasuhara S, Perez ME, Kanakubo E, Yasuhara Y, Shin YS, et al. (2000) Skeletal muscle apoptosis after burns is associated with activation of proapoptotic signals. *Am J Physiol Endocrinol Metab* 279: E1114–1121.
52. Auwerx J (1999) PPAR $\gamma$ , the ultimate thrifty gene. *Diabetologia* 42: 1033–1049.
53. Debril MB, Renaud JP, Fajas L, Auwerx J (2001) The pleiotropic functions of peroxisome proliferator-activated receptor gamma. *J Mol Med (Berl)* 79: 30–47.
54. Picard F, Auwerx J (2002) PPAR( $\gamma$ ) and glucose homeostasis. *Annu Rev Nutr* 22: 167–197.
55. Hevener AL, He W, Barak Y, Le J, Bandyopadhyay G, et al. (2003) Muscle-specific Pparg deletion causes insulin resistance. *Nat Med* 9: 1491–1497.
56. Savage DB (2005) PPAR gamma as a metabolic regulator: insights from genomics and pharmacology. *Expert Rev Mol Med* 7: 1–16.
57. Perez A, van Heeckeren AM, Nichols D, Gupta S, Eastman JF, et al. (2008) Peroxisome proliferator-activated receptor-gamma in cystic fibrosis lung epithelium. *Am J Physiol Lung Cell Mol Physiol* 295: L303–313.
58. Chiang MC, Chern Y, Huang RN (2012) PPAR $\gamma$  rescue of the mitochondrial dysfunction in Huntington's disease. *Neurobiol Dis* 45: 322–328.
59. Jahoor A, Patel R, Bryan A, Do C, Krier J, et al. (2008) Peroxisome proliferator-activated receptors mediate host cell proinflammatory responses to *Pseudomonas aeruginosa* autoinducer. *J Bacteriol* 190: 4408–4415.
60. Rutanen J, Yaluri N, Modi S, Pihlajamaki J, Vanttinen M, et al. (2010) SIRT1 mRNA expression may be associated with energy expenditure and insulin sensitivity. *Diabetes* 59: 829–835.
61. Hammarstedt A, Jansson PA, Wesslau C, Yang X, Smith U (2003) Reduced expression of PGC-1 and insulin-signaling molecules in adipose tissue is associated with insulin resistance. *Biochem Biophys Res Commun* 301: 578–582.
62. van Heeckeren AM, Tscheikuna J, Walenga RW, Konstan MW, Davis PB, et al. (2000) Effect of *Pseudomonas* infection on weight loss, lung mechanics, and cytokines in mice. *Am J Respir Crit Care Med* 161: 271–279.
63. Anderwald C, Bernroider E, Krssak M, Stingl H, Brehm A, et al. (2002) Effects of insulin treatment in type 2 diabetic patients on intracellular lipid content in liver and skeletal muscle. *Diabetes* 51: 3025–3032.
64. Hussey J, Gormley J, Leen G, Grealley P (2002) Peripheral muscle strength in young males with cystic fibrosis. *J Cyst Fibros* 1: 116–121.
65. Brindle KM, Blackledge MJ, Challiss RA, Radda GK (1989) <sup>31</sup>P NMR magnetization-transfer measurements of ATP turnover during steady-state isometric muscle contraction in the rat hind limb in vivo. *Biochemistry* 28: 4887–4893.
66. Jucker BM, Dufour S, Ren J, Cao X, Previs SF, et al. (2000) Assessment of mitochondrial energy coupling in vivo by <sup>13</sup>C/<sup>31</sup>P NMR. *Proc Natl Acad Sci U S A* 97: 6880–6884.
67. Sako EY, Kingsley-Hickman PB, From AH, Foker JE, Ugurbil K (1988) ATP synthesis kinetics and mitochondrial function in the postischemic myocardium as studied by <sup>31</sup>P NMR. *J Biol Chem* 263: 10600–10607.
68. Kingsley-Hickman PB, Sako EY, Ugurbil K, From AH, Foker JE (1990) <sup>31</sup>P NMR measurement of mitochondrial uncoupling in isolated rat hearts. *J Biol Chem* 265: 1545–1550.
69. Boesch C, Slotboom J, Hoppeler H, Kreis R (1997) In vivo determination of intra-myocellular lipids in human muscle by means of localized <sup>1</sup>H-MR-spectroscopy. *Magn Reson Med* 37: 484–493.
70. Vermathen P, Kreis R, Boesch C (2004) Distribution of intramyocellular lipids in human calf muscles as determined by MR spectroscopic imaging. *Magn Reson Med* 51: 253–262.
71. Havel RJ, Carlson LA, Ekelund LG, Holmgren A (1964) Turnover Rate and Oxidation of Different Free Fatty Acids in Man During Exercise. *J Appl Physiol* 19: 613–618.
72. Kayar SR, Hoppeler H, Howald H, Claassen H, Oberholzer F (1986) Acute effects of endurance exercise on mitochondrial distribution and skeletal muscle morphology. *Eur J Appl Physiol Occup Physiol* 54: 578–584.
73. Petersen KF, Befroy D, Dufour S, Dziura J, Ariyan C, et al. (2003) Mitochondrial dysfunction in the elderly: possible role in insulin resistance. *Science* 300: 1140–1142.
74. Petersen KF, Dufour S, Befroy D, Garcia R, Shulman GI (2004) Impaired mitochondrial activity in the insulin-resistant offspring of patients with type 2 diabetes. *N Engl J Med* 350: 664–671.
75. Roden M, Price TB, Perseghin G, Petersen KF, Rothman DL, et al. (1996) Mechanism of free fatty acid-induced insulin resistance in humans. *J Clin Invest* 97: 2859–2865.
76. Dresner A, Laurent D, Marcucci M, Griffin ME, Dufour S, et al. (1999) Effects of free fatty acids on glucose transport and IRS-1-associated phosphatidylinositol 3-kinase activity. *J Clin Invest* 103: 253–259.
77. McGarry JD (2002) Banting lecture 2001: dysregulation of fatty acid metabolism in the etiology of type 2 diabetes. *Diabetes* 51: 7–18.
78. Pollare T, Vessby B, Lithell H (1991) Lipoprotein lipase activity in skeletal muscle is related to insulin sensitivity. *Arterioscler Thromb* 11: 1192–1203.
79. Kiens B, Lithell H, Mikines KJ, Richter EA (1989) Effects of insulin and exercise on muscle lipoprotein lipase activity in man and its relation to insulin action. *J Clin Invest* 84: 1124–1129.
80. Rietschel E, van Koningsbruggen S, Fricke O, Semler O, Schoenau E (2008) Whole body vibration: a new therapeutic approach to improve muscle function in cystic fibrosis? *Int J Rehabil Res* 31: 253–256.
81. O'Riordan SM, Robinson PD, Donaghy K, Moran A (2008) Management of cystic fibrosis-related diabetes. *Pediatr Diabetes* 9: 338–344.
82. Govan JR, Deretic V (1996) Microbial pathogenesis in cystic fibrosis: mucoid *Pseudomonas aeruginosa* and *Burkholderia cepacia*. *Microbiol Rev* 60: 539–574.
83. Beisel WR, Sawyer WD, Ryll ED, Crozier D (1967) Metabolic effects of intracellular infections in man. *Ann Intern Med* 67: 744–779.
84. Chang HR, Bistrian B (1998) The role of cytokines in the catabolic consequences of infection and injury. *JPEN J Parenter Enteral Nutr* 22: 156–166.
85. Chandra RK (1983) Nutrition, immunity, and infection: present knowledge and future directions. *Lancet* 1: 688–691.
86. Paton NI, Angus B, Chaowagul W, Simpson AJ, Suputtamongkol Y, et al. (2001) Protein and energy metabolism in chronic bacterial infection: studies in melioidosis. *Clin Sci (Lond)* 100: 101–110.
87. Scott-Thomas A, Pearson J, Chambers S (2011) Potential sources of 2-aminoacetophenone to confound the *Pseudomonas aeruginosa* breath test, including analysis of a food challenge study. *J Breath Res* 5: 046002.
88. Reynolds HY, Di Sant'Agnes PA, Zierdt CH (1976) Mucoid *Pseudomonas aeruginosa*. A sign of cystic fibrosis in young adults with chronic pulmonary disease? *Jama* 236: 2190–2192.
89. Majai G, Sarang Z, Csomos K, Zahuczky G, Fesus L (2007) PPAR $\gamma$ -dependent regulation of human macrophages in phagocytosis of apoptotic cells. *Eur J Immunol* 37: 1343–1354.
90. Macallan DC, McNurlan MA, Milne E, Calder AG, Garlick PJ, et al. (1995) Whole-body protein turnover from leucine kinetics and the response to nutrition in human immunodeficiency virus infection. *Am J Clin Nutr* 61: 818–826.
91. Macallan DC, McNurlan MA, Kurpad AV, de Souza G, Shetty PS, et al. (1998) Whole body protein metabolism in human pulmonary tuberculosis and undernutrition: evidence for anabolic block in tuberculosis. *Clin Sci (Lond)* 94: 321–331.
92. Frick CG, Fink H, Gordan ML, Eckel B, Martyn JA, et al. (2008) Chronic *Escherichia coli* infection induces muscle wasting without changing acetylcholine receptor numbers. *Intensive Care Med* 34: 561–567.
93. Morton RE, Hutchings J, Halliday D, Rennie MJ, Wolman SL (1988) Protein metabolism during treatment of chest infection in patients with cystic fibrosis. *Am J Clin Nutr* 47: 214–219.
